# Supplementary material for: Aberrant Myosin 1b Expression Promotes Cell Migration and Lymph Node Metastasis of HNSCC
Source: Oxford University Press journal article supplement (doi:10.1158/1541-7786.mcr-14-0410), 2014-11-24
Supplement: 15417786mcr140410-sup-135062_1_supp_2713701_ndv1hc.doc [file 15417786mcr140410-sup-135062_1_supp_2713701_ndv1hc.doc]

# Supplementary figure legends

**Supplementary Figure 1.** **Myo1b is highly expressed in human HNSCC.** *Myo1b* is highly expressed in human HNSCC tissues. In all analyses *Myo1b* was significantly upregulated in cancer tissue compared with normal tissues (***P* < 0.01). Six representative analyses out of 13 are shown in box plots. Left side: normal tissue data; right side: cancer tissue data (***P* < 0.01).

**Supplementary Figure 2.** ***Myo1b* is upregulated in cancer tissues of HNSCC.** *Myo1b* mRNA expression is significantly upregulated in cancer tissues compared with normal tissues from the same individuals, as shown by quantitative PCR analysis. (A) Relative expression of *Myo1b* mRNA was standardized by using GAPDH gene expression as an internal reference, and each value was shown after normalization to the *Myo1b* expression level in HSC3 as the baseline value (= 1) from one experiment, white bar: normal tissue data; black bar: cancer tissue data. (B) Clinical information of each patient was shown (FP: 5-fluorouracil + Cisplatin).

**Supplementary Figure 3. Significant correlation between Myo1b-ImageJ score and “high and low” classification using Myo1b-IHC score.** We analyzed the DAB intensity of Myo1b IHC using ImageJ (see matelials and methods), and confirmed the accuracy of our analysis using the Myo1b IHC score. (A) Myo1b-ImageJ scores in the high IHC score group were significantly higher than those in the low IHC score group. Results show average of Myo1b-ImageJ scores as mean ± SD (n =15 and 16; ***p* = 0.0012, Student’s *t*-test). (B) By using the median value of Myo1b-ImageJ scores as a cutoff point to classify the cohort into high and low groups, we also confirmed that the IHC score positively correlates with the ImageJ score (**p* = 0.032, Fisher’s exact test).

**Supplementary Figure 4. Representative immunohistochemistry samples for Myo1b and D2-40.** (A, B) Expression of Myo1b protein in human HNSCC was evaluated by IHC studies, and Myo1b was detected in all 31 human tongue cancer tissues evaluated, but was not expressed in adjacent normal tissues. Representative samples in lower magnification are shown. Bar: 500μm. (C, D) Representative lymphatic invasion-positive samples detected by IHC using D2-40 are shown. White arrows indicate sites of lymphatic invasion. Bar: 100μm.

**Supplementary Figure 5. *Myo1b* knockdown by shRNA in SAS inhibits cell migration and invasion.** *Myo1b* knockdown using shRNA inhibits *in vitro* cell migration and invasion of human HNSCC. Decrease of Myo1b protein by *Myo1b-*specific shRNA in human HNSCC cell lines, SAS, was confirmed by western blotting (Fig. 3C). These shRNAs significantly inhibited cell migration and invasion of SAS. SAS transfected with shRNAs were used for Transwell migration (A), invasion (B) and proliferation (C) assays. Migration, invasion and proliferation were evaluated by real-time monitoring for 48 h using the xCELLigence RTCA DP instrument as described in the Material and methods. shNC: control shRNA; sh1 or sh2: shRNA specific for human *Myo1b* (sh-Myo1b-1 and sh-Myo1b-2 respectively). Results show cell index at representative time-points (28 h for migration and invasion, 36 h for proliferation) compared with each cell index of shNC (1), shown as mean ± SD (n = 4; n.s.: not significant, **P* < 0.05, ***P* < 0.01; Student’s *t*-test), representative of three separate experiments.

**Supplementary Figure 6.** **Myo1b regulates cell motility of human HNSCC not depending on the major EMT inducing transcription factors.** Myo1b regulates motility of HNSCC cell lines, SAS and HSC4, not depending on the major EMT inducing transcription factors. (A-F) *Myo1b* knockdown in SAS and HSC4 did not affect expression of EMT governing transcription factors such as *Snail1* and *Twist 1*, or EMT related molecules such as *CDH1* (*E-cadherin*). Transfections were as follows. shNC: control shRNA; sh1 or sh2: shRNA specific for human *Myo1b* (sh-Myo1b-1 or sh-Myo1b-2 respectively); siNC: scrambled siRNA; si1 or sh2: siRNA specific for human *Myo1b* (sh-Myo1b-1 and sh-Myo1b-2 respectively). (A, D) Relative expression of *Snail1* mRNA (shNC, siNC = 1). (B, E) Relative expression of *Twist1* mRNA (shNC, siNC = 1). (C, F) Relative expression of *CDH1* mRNA (shNC, siNC = 1). (G-J) TGF-β1-induced EMT in SAS and HSC4 did not result in Myo1b induction. SAS-T or HSC4-T: SAS or HSC4 cells treated with TGF-β1 for EMT induction (see Materials and methods). (G, I) EMT was induced by TGF-β1 stimulation. Relative expression of *Snail1* mRNA (SAS, HSC4 = 1). (H, J) Relative expression of *Myo1b* mRNA (SAS, HSC4 = 1). The values shown are means minimum and maximum relative quantification (RQ), which is given by the SDS Software (*n* = 3).

**Supplementary Figure 7. Detection of focal lymph node metastasis by IHC for Turbo-GFP.** We detected focal lymph node metastatic lesion by IHC for Turbo-GFP. (A, B) Two representative immunestaining results of cervical lymph node tissues from cervical lymph node metastatic model using nude mice in day 14 with anti-Turbo-GFP pAb are shown. These samples has lymph node metastatic lesion. (A) Sample 1 was implanted SAS-sh-NC cell. (B) Sample 2 was implanted SAS-sh-Myo1b cell. Bar: 100μm.
